# Supplementary material for: Integrin-linked kinase control dental pulp stem cell senescence via the mTOR signaling pathway
Source: PubMed Central journal article supplement (PMC11464141; doi:10.1093/stmcls/sxae047), 2024-09-02
Supplement: sxae047_suppl_supplementary_materials.pdf [file sxae047_suppl_supplementary_materials.pdf]

**Integrin-linked kinase control dental pulp stem cell senescence via  
the mTOR signaling pathway**

**Appendix Table 1: Details of different age donors**

| Donor | Age (years old) | Gender |
|-------|-----------------|--------|
| 1     | 15              | Female |
| 2     | 15              | Male   |
| 3     | 16              | Male   |
| 4     | 17              | Male   |
| 5     | 17              | Female |
| 6     | 19              | Female |
| 7     | 20              | Female |
| 8     | 22              | Male   |
| 9     | 23              | Male   |
| 10    | 28              | Female |
| 11    | 32              | Male   |
| 12    | 33              | Male   |
| 13    | 36              | Male   |
| 14    | 38              | Female |
| 15    | 38              | Female |
| 16    | 40              | Male   |
| 17    | 42              | Female |
| 18    | 44              | Female |
| 19    | 45              | Male   |
| 20    | 46              | Male   |
| 21    | 51              | Female |
| 22    | 55              | Male   |
| 23    | 56              | Female |
| 24    | 65              | Female |
| 25    | 69              | Male   |

**Appendix Table 2: The primers used in the study**

| Gene    | Sequence 5' to 3'            |
|---------|------------------------------|
| GAPDH-F | GGAGCGAGATCCCTCCAAAAT        |
| GAPDH-R | GGCTGTTGTCATACTTCTCATGG      |
| P16-F   | TGCCCAACGCACCGAATAGT         |
| P16-R   | CAGCAGCTCCGCCACTCG           |
| P21-F   | TGTCCGTCAGAACCCATGC          |
| P21-R   | AAAGTCGAAGTTCCATCGCTC        |
| P53-F   | AATCTACTGGGACGGAACAGCTTTGAGG |
| P53-R   | GGAGAGGAGCTGGTGTGTTGGG       |
| IL6-F   | GCCCAGCTATGAACTCCTTCT        |
| IL6-R   | GAAGGCAGCAGGCAACAC           |
| IL8-F   | ACTGAGAGTGATTGAGAGTGGAC      |
| IL8-R   | AACCCTCTGCACCCAGTTTTTC       |
| MMP13-F | ACTGAGAGGCTCCGAGAAATG        |
| MMP13-R | GAACCCCGCATCTTGCTT           |
| ALP-F   | GTGAACCGCAACTGGTACTC         |
| ALP-R   | GAGCTGCGTAGCGATGTCC          |
| RUNX2-F | CAGACCAGCAGCACTCCATAT        |
| RUNX2-R | CAGCGTCAACACCATCATTC         |
| BMP2-F  | ACTACCAGAAACGAGTGGGAA        |
| BMP2-R  | GCATCTGTTCTCGAAAACCT         |
| DSPP-F  | GCATTCAGGGACAAGTAAGCA        |
| DSPP-R  | CTTGGACAACAGCGACATCCT        |
| DMP1-F  | AGCCATTCTGAGGAAGACGA         |
| DMP1-R  | TGTTGTGATAGGCATCAACTGTTA     |
| SOX2-F  | GCCGAGTGGAACTTTTGTCG         |
| SOX2-R  | GGCAGCGTGTACTTATCCTTCT       |
| GFAP-F  | CTGTTGCCAGAGATGGAGGTT        |
| GFAP-R  | TCATCGCTCAGGAGGTCCTT         |
| GAP43-F | GGCCGCAACCAAAATTCAGG         |
| GAP43-R | CGGCAGTAGTGGTGCCTTC          |

**Appendix Table 3: Top 10 KEGG pathways for each CCP**

| Top 10<br>KEGG<br>pathways | CCP                                  |                                                    |                                                |
|----------------------------|--------------------------------------|----------------------------------------------------|------------------------------------------------|
|                            | CCP1                                 | CCP2                                               | CCP3                                           |
| 1                          | DNA replication                      | ECM-receptor interaction                           | Yersinia infection                             |
| 2                          | Mismatch repair                      | Hypertrophic cardiomyopathy                        | Ubiquitin mediated proteolysis                 |
| 3                          | Nucleotide excision<br>repair        | Dilated cardiomyopathy                             | Fc gamma R-mediated<br>phagocytosis            |
| 4                          | RNA polymerase                       | Arrhythmogenic right<br>ventricular cardiomyopathy | Pathogenic Escherichia coli<br>infection       |
| 5                          | Spliceosome                          | Focal adhesion                                     | Amino sugar and nucleotide<br>sugar metabolism |
| 6                          | Steroid biosynthesis                 | Lysosome                                           | Platelet activation                            |
| 7                          | Cell cycle                           | Human papillomavirus<br>infection                  | Regulation of actin<br>cytoskeleton            |
| 8                          | Ribosome biogenesis in<br>eukaryotes | Proteoglycans in cancer                            | Human cytomegalovirus<br>infection             |
| 9                          | RNA degradation                      | Regulation of actin<br>cytoskeleton                | Vascular smooth muscle<br>contraction          |
| 10                         | Terpenoid backbone<br>biosynthesis   | PI3K-Akt signaling pathway                         | Legionellosis                                  |

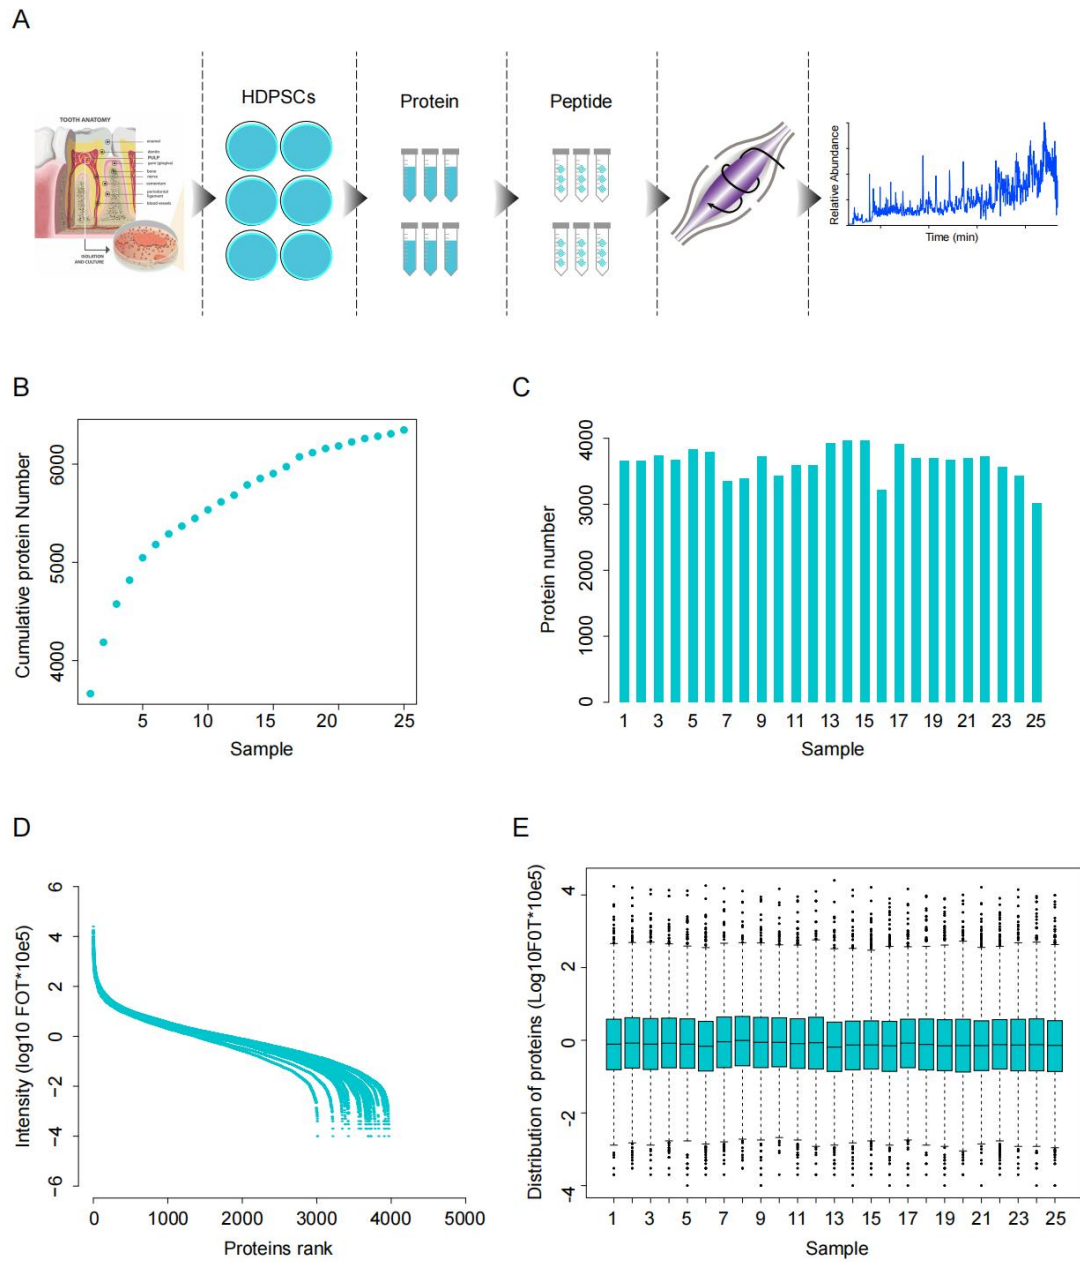

**Appendix Figure 1.** Proteomic landscape of HDPSCs samples. **(A)** Overview of the experimental design for proteomics analyses. **(B)** Cumulative number of proteins

identified as a function of sample numbers. **(C)** Number of proteins identified in 25 samples. **(D)** Overview of the proteomics profile of HDPSCs samples. The dynamics of protein abundances identified in 25 samples are shown. Proteins were quantified as a normalized intensity-based fraction of total (FOT) value and log<sub>10</sub> transformed. The highest-abundance and lowest-abundance proteins are shown. **(E)** Distribution of protein abundance presented as median intensity in 25 samples.

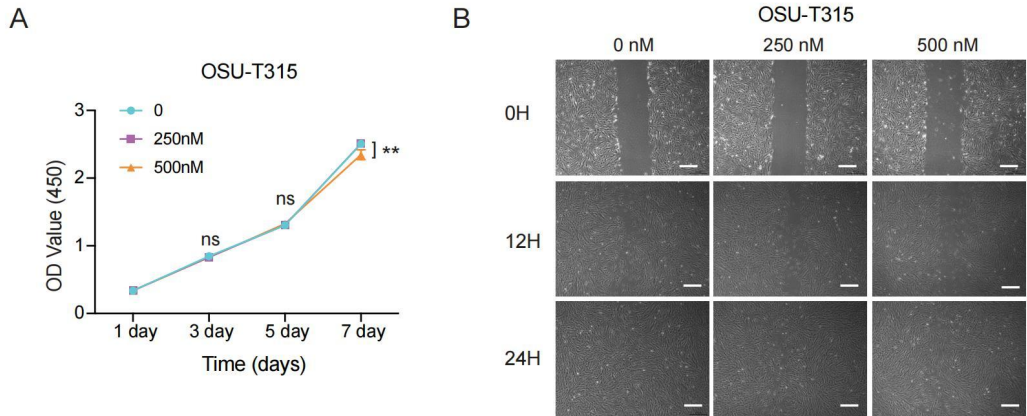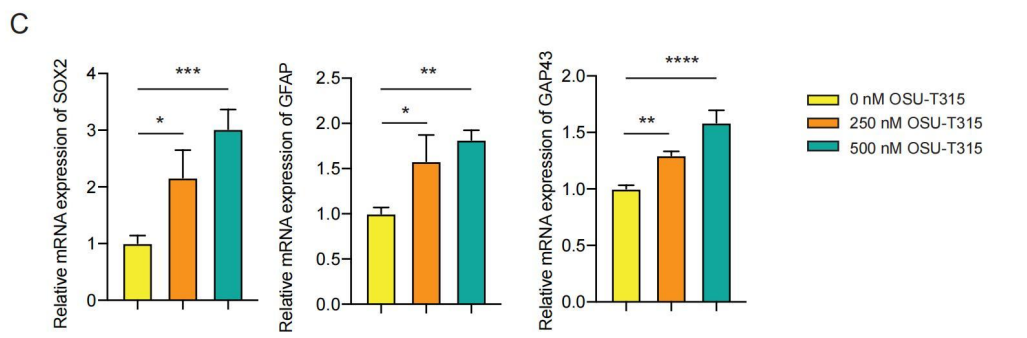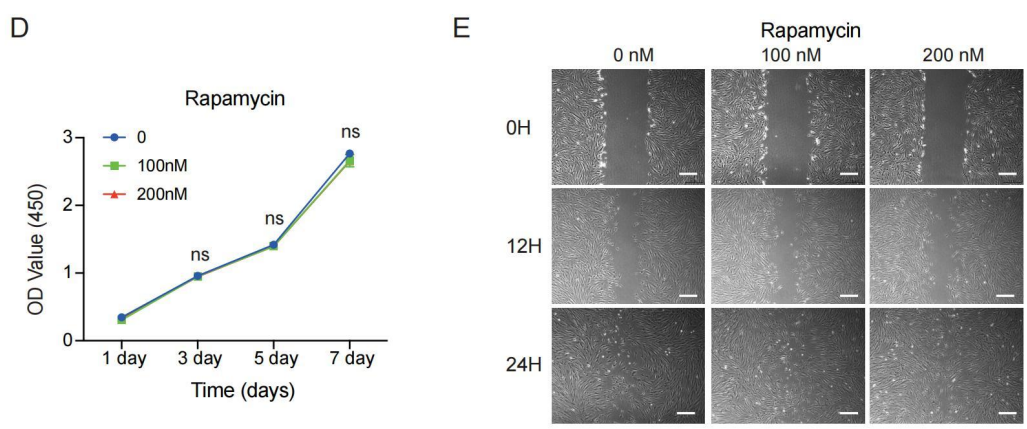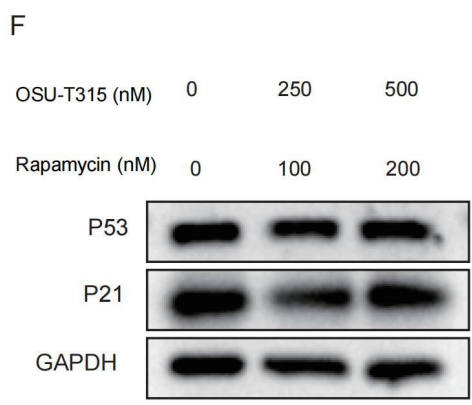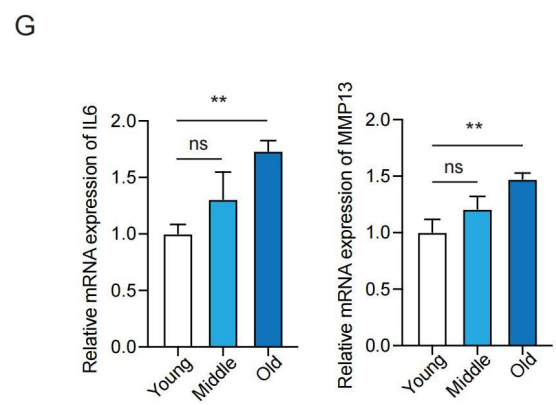

**Appendix Figure 2.** Cell function changes of O-HDPSCs pretreatment with inhibitors (OSU-T315 and Rapamycin). **(A)** Results of the CCK-8 assay of HDPSCs pretreatment with OSU-T315 (n=3). **(B)** Representative images of migration of HDPSCs pretreatment with OSU-T315. Scale bar = 100  $\mu$ m. **(C)** Quantitative RT-PCR results of mRNA expression of SOX2, GFAP and GAP43 in O-HDPSCs pretreated with and without OSU-T315 induced in neurogenic induction medium for up to 7 days (n=3). **(D)** Results of the CCK-8 assay of HDPSCs pretreatment with OSU-T315 (n=3). **(E)** Representative images of migration of HDPSCs pretreatment with Rapamycin. Scale bar = 200  $\mu$ m. **(F)** O-HDPSCs treated with serial concentrations of OSU-T315 and Rapamycin for 3 days were subjected to western blot analysis. **(G)** Quantitative RT-PCR results of mRNA expression of IL6 and MMP13 in different age groups (n=3). \*p<0.05. \*\*p<0.01, \*\*\*p<0.005.
